# Supplementary material
Source: PubMed Central journal article supplement (PMC6322020)
Supplement: AnnalsATS.201806-420OC_wendlandt_data_supplement.pdf [file AnnalsATS.201806-420OC_wendlandt_data_supplement.pdf]

## **Online Data Supplement**

### **Risk Factors for Post-Traumatic Stress Disorder Symptoms in Surrogate Decision-Makers of Patients with Chronic Critical Illness**

Blair Wendlandt, MD; Agathe Ceppe, MS; Summer Choudhury, MPH; Judith E. Nelson, MD, JD; Christopher E. Cox, MD, MPH; Laura C. Hanson, MD, MPH; Marion Danis, MD; James A. Tulsky, MD; Shannon S. Carson, MD

**Supplementary Table E1: Results of Multivariable Analysis of association of IES-R score with Surrogate Decision-Maker-related variables, with coefficients and 95% confidence intervals for confounders<sup>e</sup>**

| Potential Risk Factor<br>Adjusted Beta coefficient (95% CI) ^                           | Covariate                | Covariate Category        | Beta coefficient<br>(95% CI) ^ | P value |
|-----------------------------------------------------------------------------------------|--------------------------|---------------------------|--------------------------------|---------|
| Surrogate Age<br>-0.08 (-0.25 to 0.08)                                                  | Surrogate Education      | Advanced Degree           | -1.82 (-7.89 to 4.26)          | 0.68    |
|                                                                                         |                          | College Graduate          | -1.23 (-6.5 to 4.04)           | 0.68    |
|                                                                                         |                          | Some College              | 1.42 (-3.82 to 6.66)           | 0.68    |
|                                                                                         |                          | High School or Less       | ---                            |         |
|                                                                                         | Surrogate Employment     | Disabled                  | 5.87 (-3.01 to 14.75)          | 0.38    |
|                                                                                         |                          | Employed/Student          | 4.15 (-2.76 to 11.06)          | 0.38    |
|                                                                                         |                          | Homemaker                 | -1.51 (-11.03 to 8.01)         | 0.38    |
|                                                                                         |                          | Retired                   | 3.33 (-5.13 to 11.78)          | 0.38    |
|                                                                                         |                          | Unemployed                | ---                            |         |
|                                                                                         | Surrogate Religion       | Catholic                  | 5.54 (-4.08 to 15.15)          | 0.47    |
|                                                                                         |                          | Jewish                    | 6.09 (-5.58 to 17.75)          | 0.47    |
|                                                                                         |                          | Other                     | 11.14 (-0.65 to 22.93)         | 0.47    |
|                                                                                         |                          | Protestant                | 6.06 (-2.69 to 14.8)           | 0.47    |
|                                                                                         |                          | None                      | ---                            |         |
| Surrogate Age                                                                           |                          | -0.08 (-0.25 to 0.08)     | 0.32                           |         |
| Surrogate HADS                                                                          |                          | 0.96 (0.72 to 1.19)       | <.0001                         |         |
| Surrogate Female Sex<br>2.47 (-1.82 to 6.75)                                            | Surrogate Education      | Advanced Degree           | -1.24 (-7.31 to 4.82)          | 0.76    |
|                                                                                         |                          | College Graduate          | -0.77 (-6.02 to 4.47)          | 0.76    |
|                                                                                         |                          | Some College              | 1.59 (-3.67 to 6.85)           | 0.76    |
|                                                                                         |                          | High School or Less       | ---                            |         |
|                                                                                         | Surrogate Employment     | Employment                | 5.41 (-3.4 to 14.23)           | 0.30    |
|                                                                                         |                          | Employed/Student          | 3.86 (-3.05 to 10.76)          | 0.30    |
|                                                                                         |                          | Homemaker                 | -2.57 (-12.07 to 6.93)         | 0.30    |
|                                                                                         |                          | Retired                   | 1.68 (-6.01 to 9.36)           | 0.30    |
|                                                                                         |                          | Unemployed                | ---                            |         |
|                                                                                         | Surrogate Religion       | Catholic                  | 3.37 (-6.13 to 12.86)          | 0.61    |
|                                                                                         |                          | Jewish                    | 4.22 (-7.25 to 15.69)          | 0.61    |
|                                                                                         |                          | Other                     | 9.39 (-2.28 to 21.06)          | 0.61    |
|                                                                                         |                          | Protestant                | 3.87 (-4.75 to 12.49)          | 0.61    |
|                                                                                         |                          | None                      | ---                            |         |
| Surrogate HADS                                                                          |                          | 0.95 (0.71 to 1.19)       | <.0001                         |         |
| Surrogate Race<br>Black 1.86 (-3.44 to 7.15)<br>Other 3.96 (3.96 to 10.25)<br>White --- | Surrogate Education      | Advanced Degree           | -0.92 (-7.07 to 5.24)          | 0.82    |
|                                                                                         |                          | College Graduate          | -0.43 (-5.8 to 4.94)           | 0.82    |
|                                                                                         |                          | Some College              | 1.61 (-3.7 to 6.91)            | 0.82    |
|                                                                                         |                          | High School or Less       | ---                            |         |
|                                                                                         | Surrogate Employment     | Disabled                  | 5.33 (-3.56 to 14.22)          | 0.44    |
|                                                                                         |                          | Employed/Student          | 4.07 (-2.91 to 11.06)          | 0.44    |
|                                                                                         |                          | Homemaker                 | -1.31 (-10.97 to 8.36)         | 0.44    |
|                                                                                         |                          | Retired                   | 2.23 (-5.56 to 10.01)          | 0.44    |
|                                                                                         |                          | Unemployed                | ---                            |         |
|                                                                                         | Surrogate Marital Status | Married/Live with partner | -2.2 (-7.33 to 2.93)           | 0.68    |
|                                                                                         |                          | Separated/Divorced        | -0.91 (-7.96 to 6.13)          | 0.68    |
|                                                                                         |                          | Single/Widowed            | ---                            |         |
|                                                                                         | Surrogate Religion       | Catholic                  | 3.86 (-5.63 to 13.35)          | 0.62    |
|                                                                                         |                          | Jewish                    | 5.07 (-6.66 to 16.8)           | 0.62    |

|                                                                 |                                                                                                                                                        |                       |                       |                       |      |
|-----------------------------------------------------------------|--------------------------------------------------------------------------------------------------------------------------------------------------------|-----------------------|-----------------------|-----------------------|------|
|                                                                 |                                                                                                                                                        | Other                 | 9.38 (-2.44 to 21.19) | 0.62                  |      |
|                                                                 |                                                                                                                                                        | Protestant            | 5.04 (-3.73 to 13.81) | 0.62                  |      |
|                                                                 |                                                                                                                                                        | None                  | ---                   |                       |      |
|                                                                 | Surrogate HADS                                                                                                                                         |                       | 0.99 (0.75 to 1.23)   | <.0001                |      |
| Surrogate Hispanic or Latino Ethnicity<br>-1.68 (-8.49 to 5.12) | Surrogate Education                                                                                                                                    | Advanced Degree       | -1.48 (-7.55 to 4.6)  | 0.77                  |      |
|                                                                 |                                                                                                                                                        | College Graduate      | -0.98 (-6.28 to 4.33) | 0.77                  |      |
|                                                                 |                                                                                                                                                        | Some College          | 1.34 (-3.92 to 6.61)  | 0.77                  |      |
|                                                                 |                                                                                                                                                        | High School or Less   | ---                   |                       |      |
|                                                                 | Surrogate Employment                                                                                                                                   | Disabled              | 5.22 (-3.61 to 14.05) | 0.34                  |      |
|                                                                 |                                                                                                                                                        | Employed / Student    | 3.87 (-3.06 to 10.8)  | 0.34                  |      |
|                                                                 |                                                                                                                                                        | Homemaker             | -2.19 (-11.69 to 7.3) | 0.34                  |      |
|                                                                 |                                                                                                                                                        | Retired               | 1.62 (-6.1 to 9.34)   | 0.34                  |      |
|                                                                 |                                                                                                                                                        |                       | Unemployed            | ---                   |      |
|                                                                 | Surrogate Religion                                                                                                                                     | Catholic              | 4.52 (-5.15 to 14.18) | 0.63                  |      |
|                                                                 |                                                                                                                                                        | Jewish                | 3.87 (-7.62 to 15.37) | 0.63                  |      |
|                                                                 |                                                                                                                                                        | Other                 | 9.37 (-2.35 to 21.08) | 0.63                  |      |
|                                                                 |                                                                                                                                                        | Protestant            | 4.34 (-4.24 to 12.93) | 0.63                  |      |
|                                                                 |                                                                                                                                                        | None                  | ---                   |                       |      |
|                                                                 | Surrogate HADS                                                                                                                                         |                       | 0.98 (0.75 to 1.22)   | <.0001                |      |
|                                                                 | Surrogate Marital Status<br>Married/Live with partner<br>-2.34 (-7.38 to 6.07)<br>Separated/Divorced<br>-0.86 (-7.78 to 6.07)<br>Single/Widowed<br>--- | Surrogate Employment  | Disabled              | 5.68 (-2.91 to 14.27) | 0.44 |
| Employed / Student                                              |                                                                                                                                                        |                       | 4.6 (-2.14 to 11.33)  | 0.44                  |      |
| Homemaker                                                       |                                                                                                                                                        |                       | -0.19 (-9.52 to 9.13) | 0.44                  |      |
| Retired                                                         |                                                                                                                                                        |                       | 2.7 (-4.87 to 10.27)  | 0.44                  |      |
| Unemployed                                                      |                                                                                                                                                        |                       | ---                   |                       |      |
| Surrogate Race                                                  |                                                                                                                                                        | Black                 | 1.93 (-3.37 to 7.22)  | 0.37                  |      |
|                                                                 |                                                                                                                                                        | Other                 | 4.2 (-2.02 to 10.42)  | 0.37                  |      |
|                                                                 |                                                                                                                                                        | White                 | ---                   |                       |      |
| Surrogate Religion                                              |                                                                                                                                                        | Catholic              | 4.45 (-4.97 to 13.87) | 0.56                  |      |
|                                                                 |                                                                                                                                                        | Jewish                | 5.48 (-6.1 to 17.06)  | 0.56                  |      |
|                                                                 |                                                                                                                                                        | Other                 | 9.87 (-1.81 to 21.55) | 0.56                  |      |
|                                                                 |                                                                                                                                                        | Protestant            | 5.63 (-3.04 to 14.3)  | 0.56                  |      |
|                                                                 |                                                                                                                                                        | None                  | ---                   |                       |      |
| Surrogate HADS                                                  |                                                                                                                                                        |                       | 0.97 (0.74 to 1.21)   | <.0001                |      |
| Surrogate Employment                                            |                                                                                                                                                        | Disabled              | 5.25 (-3.72 to 14.22) | 0.45                  |      |
|                                                                 |                                                                                                                                                        | Employed / Student    | 3.93 (-3.04 to 10.89) | 0.45                  |      |
|                                                                 | Homemaker                                                                                                                                              | -1.6 (-11.29 to 8.08) | 0.45                  |                       |      |
|                                                                 | Retired                                                                                                                                                | 2.12 (-5.71 to 9.96)  | 0.45                  |                       |      |
|                                                                 | Unemployed                                                                                                                                             | ---                   |                       |                       |      |
| Surrogate Marital Status                                        | Married/Live with partner                                                                                                                              | -2.74 (-7.96 to 2.48) | 0.57                  |                       |      |
|                                                                 | Separated/Divorced                                                                                                                                     | -1.4 (-8.5 to 5.69)   | 0.57                  |                       |      |
|                                                                 | Single/Widowed                                                                                                                                         | ---                   |                       |                       |      |
| Surrogate Race                                                  | Black                                                                                                                                                  | 1.92 (-3.48 to 7.33)  | 0.27                  |                       |      |
|                                                                 | Other                                                                                                                                                  | 5.52 (-1.4 to 12.44)  | 0.27                  |                       |      |
|                                                                 | White                                                                                                                                                  | ---                   |                       |                       |      |
| Surrogate Religion                                              | Catholic                                                                                                                                               | 4.65 (-5.27 to 14.58) | 0.68                  |                       |      |
|                                                                 | Jewish                                                                                                                                                 | 5.89 (-5.91 to 17.68) | 0.68                  |                       |      |
|                                                                 | Other                                                                                                                                                  | 8.75 (-3.12 to 20.62) | 0.68                  |                       |      |
|                                                                 | Protestant                                                                                                                                             | 4.61 (-4.31 to 13.52) | 0.68                  |                       |      |
|                                                                 | None                                                                                                                                                   | ---                   |                       |                       |      |
| Surrogate Sex                                                   | Female                                                                                                                                                 | 2.1 (-2.25 to 6.46)   | 0.34                  |                       |      |
| Patient Insurance                                               | Commercial                                                                                                                                             | 1.56 (-6.34 to 9.46)  | 0.89                  |                       |      |

|                                                                                                                                                                                                      |                          |                           |                        |        |
|------------------------------------------------------------------------------------------------------------------------------------------------------------------------------------------------------|--------------------------|---------------------------|------------------------|--------|
|                                                                                                                                                                                                      |                          | Medicaid                  | -0.16 (-10.04 to 9.72) | 0.89   |
|                                                                                                                                                                                                      | Patient Insurance        | Medicare                  | -0.37 (-7.93 to 7.19)  | 0.89   |
|                                                                                                                                                                                                      |                          | None                      | ---                    |        |
|                                                                                                                                                                                                      | Surrogate ethnicity      | Hispanic or Latino        | -4.52 (-12.16 to 3.11) | 0.24   |
|                                                                                                                                                                                                      | Surrogate HADS           |                           | 0.95 (0.7 to 1.2)      | <.0001 |
| Surrogate Education<br>Advanced Degree<br>-1.16 (-7.45 to 5.14)<br>College Graduate<br>-1.05 (-6.59 to 4.49)<br>Some College<br>1.24 (-4.2 to 6.69)<br>High School or Less<br>---                    | Surrogate Employment     | Disabled                  | 5.25 (-3.72 to 14.22)  | 0.4475 |
|                                                                                                                                                                                                      |                          | Employed / Student        | 3.93 (-3.04 to 10.89)  | 0.4475 |
|                                                                                                                                                                                                      |                          | Homemaker                 | -1.6 (-11.29 to 8.08)  | 0.4475 |
|                                                                                                                                                                                                      |                          | Retired                   | 2.12 (-5.71 to 9.96)   | 0.4475 |
|                                                                                                                                                                                                      |                          | Unemployed                | ---                    |        |
|                                                                                                                                                                                                      | Surrogate Marital Status | Married/Live with partner | -2.74 (-7.96 to 2.48)  | 0.5688 |
|                                                                                                                                                                                                      |                          | Separated/Divorced        | -1.4 (-8.5 to 5.69)    | 0.5688 |
|                                                                                                                                                                                                      |                          | Single/Widowed            | ---                    |        |
|                                                                                                                                                                                                      | Surrogate Race           | Black                     | 1.92 (-3.48 to 7.33)   | 0.2685 |
|                                                                                                                                                                                                      |                          | Other                     | 5.52 (-1.4 to 12.44)   | 0.2685 |
|                                                                                                                                                                                                      |                          | White                     | ---                    |        |
|                                                                                                                                                                                                      | Surrogate Religion       | Catholic                  | 4.65 (-5.27 to 14.58)  | 0.6754 |
|                                                                                                                                                                                                      |                          | Jewish                    | 5.89 (-5.91 to 17.68)  | 0.6754 |
|                                                                                                                                                                                                      |                          | Other                     | 8.75 (-3.12 to 20.62)  | 0.6754 |
|                                                                                                                                                                                                      |                          | Protestant                | 4.61 (-4.31 to 13.52)  | 0.6754 |
|                                                                                                                                                                                                      |                          | None                      | ---                    |        |
|                                                                                                                                                                                                      | Surrogate Sex            | Female                    | 2.1 (-2.25 to 6.46)    | 0.3386 |
| Patient Insurance                                                                                                                                                                                    | Commercial               | 1.56 (-6.34 to 9.46)      | 0.8931                 |        |
|                                                                                                                                                                                                      | Medicaid                 | -0.16 (-10.04 to 9.72)    | 0.8931                 |        |
|                                                                                                                                                                                                      | Medicare                 | -0.37 (-7.93 to 7.19)     | 0.8931                 |        |
|                                                                                                                                                                                                      | None                     | ---                       |                        |        |
| Surrogate ethnicity                                                                                                                                                                                  | Hispanic or Latino       | -4.52 (-12.16 to 3.11)    | 0.241                  |        |
| Surrogate HADS                                                                                                                                                                                       |                          | 0.95 (0.7 to 1.2)         | <.0001                 |        |
| Surrogate Employment<br>Disabled<br>5.79 (-3.22 to 14.8)<br>Employed/Student<br>3.45 (-3.4 to 10.31)<br>Homemaker<br>-1.48 (-11.09 to 8.12)<br>Retired<br>2.95 (-5.63 to 11.53)<br>Unemployed<br>--- | Surrogate Education      | Advanced Degree           | -1.46 (-7.71 to 4.78)  | 0.71   |
|                                                                                                                                                                                                      |                          | College Graduate          | -1.05 (-6.55 to 4.46)  | 0.71   |
|                                                                                                                                                                                                      |                          | Some College              | 1.59 (-3.8 to 6.98)    | 0.71   |
|                                                                                                                                                                                                      |                          | High School or Less       | ---                    |        |
|                                                                                                                                                                                                      | Surrogate Marital Status | Married/Live with partner | -2.44 (-7.78 to 2.9)   | 0.60   |
|                                                                                                                                                                                                      |                          | Separated/Divorced        | -0.43 (-7.62 to 6.76)  | 0.60   |
|                                                                                                                                                                                                      |                          | Single/Widowed            | ---                    |        |
|                                                                                                                                                                                                      | Surrogate Race           | Black                     | 2.32 (-2.91 to 7.56)   | 0.26   |
|                                                                                                                                                                                                      |                          | Other                     | 5.24 (-1.54 to 12.02)  | 0.26   |
|                                                                                                                                                                                                      |                          | White                     | ---                    |        |
|                                                                                                                                                                                                      | Surrogate Sex            | Female                    | 1.86 (-2.37 to 6.1)    | 0.38   |
|                                                                                                                                                                                                      | Patient Insurance        | Commercial                | 1.55 (-6.18 to 9.29)   | 0.90   |
|                                                                                                                                                                                                      |                          | Medicaid                  | -0.04 (-9.77 to 9.7)   | 0.90   |
|                                                                                                                                                                                                      |                          | Medicare                  | -0.33 (-7.74 to 7.07)  | 0.90   |
| None                                                                                                                                                                                                 |                          | ---                       |                        |        |
| Surrogate Age                                                                                                                                                                                        |                          | -0.06 (-0.23 to 0.11)     | 0.51                   |        |
| Surrogate ethnicity                                                                                                                                                                                  | Hispanic or Latino       | -4.57 (-11.48 to 2.34)    | 0.19                   |        |
| Surrogate HADS                                                                                                                                                                                       |                          | 0.95 (0.7 to 1.19)        | <.0001                 |        |
| Primary Surrogate Income*<br>\$15,000 - \$39,999<br>-7.57 (-16.43 to 1.29)                                                                                                                           | Surrogate Education      | Advanced Degree           | -3.23 (-11.07 to 4.6)  | 0.73   |
|                                                                                                                                                                                                      |                          | College Graduate          | -0.18 (-7.25 to 6.88)  | 0.73   |
|                                                                                                                                                                                                      |                          | Some College              | 1.05 (-5.67 to 7.77)   | 0.73   |
|                                                                                                                                                                                                      |                          | High School or Less       | ---                    |        |

|                                                                                                                                                                                        |                                                                                                                                                                                             |                           |                         |                       |
|----------------------------------------------------------------------------------------------------------------------------------------------------------------------------------------|---------------------------------------------------------------------------------------------------------------------------------------------------------------------------------------------|---------------------------|-------------------------|-----------------------|
| \$40,000 - \$100,000<br>-5.44 (-14.18 to 3.3)<br><br>Income > \$100,000<br>-3.4 (-14.24 to 7.43)<br><br>Prefer not to answer<br>-6.3 (-15.16 to 2.57)<br><br><\$15,000<br>---          | Surrogate Employment                                                                                                                                                                        | Disabled                  | 12.02 (-0.25 to 24.29)  | 0.13                  |
|                                                                                                                                                                                        |                                                                                                                                                                                             | Employed/Student          | 6.3 (-4.29 to 16.89)    | 0.13                  |
|                                                                                                                                                                                        |                                                                                                                                                                                             | Homemaker                 | -1.48 (-14.81 to 11.84) | 0.13                  |
|                                                                                                                                                                                        |                                                                                                                                                                                             | Retired                   | 3.1 (-8.81 to 15)       | 0.13                  |
|                                                                                                                                                                                        |                                                                                                                                                                                             | Unemployed                | ---                     |                       |
|                                                                                                                                                                                        | Surrogate Marital Status                                                                                                                                                                    | Married/Live with partner | -0.15 (-7.01 to 6.71)   | 0.39                  |
|                                                                                                                                                                                        |                                                                                                                                                                                             | Separated/Divorced        | 5.35 (-3.92 to 14.62)   | 0.39                  |
|                                                                                                                                                                                        |                                                                                                                                                                                             | Single/Widowed            | ---                     |                       |
|                                                                                                                                                                                        | Surrogate Race                                                                                                                                                                              | Black                     | 1.87 (-4.25 to 8)       | 0.51                  |
|                                                                                                                                                                                        |                                                                                                                                                                                             | Other                     | 4.88 (-4.23 to 13.99)   | 0.51                  |
|                                                                                                                                                                                        |                                                                                                                                                                                             | White                     | ---                     |                       |
|                                                                                                                                                                                        | Surrogate Sex                                                                                                                                                                               | Female                    | 1.1 (-4.33 to 6.53)     | 0.69                  |
|                                                                                                                                                                                        | Patient Insurance                                                                                                                                                                           | Commercial                | 4.69 (-4.87 to 14.25)   | 0.42                  |
|                                                                                                                                                                                        | Patient Insurance                                                                                                                                                                           | Medicaid                  | -2.81 (-14.22 to 8.6)   | 0.42                  |
| Medicare                                                                                                                                                                               |                                                                                                                                                                                             | 2.12 (-7.21 to 11.46)     | 0.42                    |                       |
| None                                                                                                                                                                                   |                                                                                                                                                                                             | ---                       |                         |                       |
| Surrogate Age                                                                                                                                                                          | Surrogate Age                                                                                                                                                                               | -0.02 (-0.24 to 0.2)      | 0.87                    |                       |
| Surrogate ethnicity                                                                                                                                                                    | Hispanic or Latino                                                                                                                                                                          | -4.53 (-13.31 to 4.25)    | 0.31                    |                       |
| HADS                                                                                                                                                                                   |                                                                                                                                                                                             | 1.01 (0.7 to 1.31)        | <.0001                  |                       |
| Surrogate Religion<br><br>Catholic 6.54 (-4.24 to 17.32)<br><br>Jewish 6.97 (-5.75 to 19.7)<br><br>Other 13.13 (0.64 to 25.62)<br><br>Protestant 6.05 (-3.54 to 15.63)<br><br>None --- | Surrogate Marital Status                                                                                                                                                                    | Married/Live with partner | -1.9 (-7.52 to 3.72)    | 0.67                  |
|                                                                                                                                                                                        |                                                                                                                                                                                             | Separated/Divorced        | 0.46 (-7.18 to 8.1)     | 0.67                  |
|                                                                                                                                                                                        |                                                                                                                                                                                             | Single/Widowed            | ---                     |                       |
|                                                                                                                                                                                        | Surrogate Race                                                                                                                                                                              | Black                     | -0.07 (-5.82 to 5.68)   | 0.33                  |
|                                                                                                                                                                                        |                                                                                                                                                                                             | Other                     | 5.41 (-1.94 to 12.76)   | 0.33                  |
|                                                                                                                                                                                        |                                                                                                                                                                                             | White                     | ---                     |                       |
|                                                                                                                                                                                        | Surrogate Sex                                                                                                                                                                               | Female                    | 5.12 (0.67 to 9.57)     | 0.03                  |
|                                                                                                                                                                                        | Surrogate Age                                                                                                                                                                               |                           | -0.14 (-0.29 to 0.01)   | 0.07                  |
|                                                                                                                                                                                        | Surrogate ethnicity                                                                                                                                                                         | Hispanic or Latino        | -4.81 (-12.81 to 3.18)  | 0.23                  |
|                                                                                                                                                                                        | Relationship to Patient<br><br>Child 0.65 (-8.79 to 7.5)<br><br>Parent 2.44 (-6.58 to 11.47)<br><br>Sibling 2.6 (-6.36 to 11.57)<br><br>Spouse/Partner 1.89 (-6.12 to 9.0)<br><br>Other --- | Surrogate Age             |                         | -0.12 (-0.29 to 0.04) |
|                                                                                                                                                                                        |                                                                                                                                                                                             |                           |                         |                       |
| Surrogate HADS                                                                                                                                                                         |                                                                                                                                                                                             |                           | 0.93 (0.7 to 1.17)      | <.0001                |
|                                                                                                                                                                                        |                                                                                                                                                                                             |                           |                         |                       |
| ≥2 Surrogates Per Patient<br>-3.63 (-7.74 to 0.48)                                                                                                                                     | Surrogate HADS                                                                                                                                                                              |                           | 0.97 (0.74 to 1.19)     | <.0001                |
|                                                                                                                                                                                        |                                                                                                                                                                                             |                           |                         |                       |
|                                                                                                                                                                                        |                                                                                                                                                                                             |                           |                         |                       |
|                                                                                                                                                                                        |                                                                                                                                                                                             |                           |                         |                       |
| Designation as HCPOA<br>-2.22 (-6.45 to 2)                                                                                                                                             | Patient Cancer                                                                                                                                                                              | Yes                       | -3.94 (-8.72 to 0.83)   | 0.10                  |
|                                                                                                                                                                                        | Patient Baseline ADLs                                                                                                                                                                       |                           | 0.21 (-1.23 to 1.66)    | 0.77                  |
|                                                                                                                                                                                        | Surrogate HADS                                                                                                                                                                              |                           | 0.95 (0.72 to 1.18)     | <.0001                |
|                                                                                                                                                                                        | Patient Baseline iADLs                                                                                                                                                                      |                           | 0.23 (-0.14 to 0.59)    | 0.22                  |
| Surrogate HADS<br>1.02 (0.73 to 1.3)                                                                                                                                                   | Patient Cancer                                                                                                                                                                              | Yes                       | -4.15 (-10.15 to 1.85)  | 0.17                  |
|                                                                                                                                                                                        | Patient Chronic Liver Disease                                                                                                                                                               | Yes                       | 1.38 (-6.22 to 8.99)    | 0.72                  |
|                                                                                                                                                                                        | Patient End-Stage Renal Disease                                                                                                                                                             | Yes                       | -7.64 (-22.88 to 7.59)  | 0.32                  |
|                                                                                                                                                                                        | Surrogate Employment                                                                                                                                                                        | Disabled                  | 7.05 (-2.79 to 16.9)    | 0.32                  |

|                           |                    |                         |      |
|---------------------------|--------------------|-------------------------|------|
|                           | Employed / Student | 3.6 (-3.91 to 11.11)    | 0.32 |
|                           | Homemaker          | -3.26 (-14.86 to 8.35)  | 0.32 |
|                           | Retired            | 5.71 (-3.99 to 15.4)    | 0.32 |
|                           | Unemployed         | ---                     |      |
| Surrogate Race            | Black              | 4.99 (-1.69 to 11.67)   | 0.27 |
|                           | Other              | 4.1 (-3.97 to 12.17)    | 0.27 |
|                           | White              | ---                     |      |
| Surrogate Sex             | Female             | 2.26 (-2.49 to 7.01)    | 0.34 |
| Patient RASS Score        | 1                  | 6.82 (-1 to 14.64)      | 0.11 |
|                           | 2                  | 1.94 (-6.03 to 9.9)     | 0.11 |
| Relationship to Patient   | Child              | -2.14 (-16.15 to 11.86) | 0.97 |
|                           | Parent             | -4.03 (-18.58 to 10.53) | 0.97 |
|                           | Sibling            | -2.9 (-14.99 to 9.19)   | 0.97 |
|                           | Spouse/Partner     | -1.6 (-12.22 to 9.01)   | 0.97 |
|                           | Other              | ---                     |      |
| ≥2 Surrogates Per Patient |                    | -3.64 (-9.03 to 1.76)   | 0.18 |
| Patient Baseline ADLs     |                    | -0.89 (-2.25 to 0.48)   | 0.20 |
| Patient Advance Directive | Yes                | -1.86 (-9.27 to 5.54)   | 0.61 |
| Surrogate Age             |                    | -0.12 (-0.47 to 0.24)   | 0.52 |
| Surrogate ethnicity       | Hispanic or Latino | -3.37 (-11.69 to 4.95)  | 0.42 |
| Patient Age               |                    | -0.12 (-0.49 to 0.25)   | 0.51 |
| ProVent14 Score           |                    | 0.05 (-0.11 to 0.2)     | 0.56 |

<sup>^</sup>For continuous variables, the coefficient represents mean change in IES-R score per one unit increase. For categorical variables, the coefficient represents mean difference in IES-R score as compared to the reference group.

<sup>€</sup>All models were adjusted for multiple respondents

\*Model includes primary surrogate decision-makers only

--- Indicates reference group

**Supplementary Table E2: Results Multivariable Analysis with coefficients and 95% Confidence intervals for confounders, Patient-related variables<sup>€</sup>**

| Potential Risk Factor<br>Adjusted Beta<br>coefficient (95% CI) <sup>^</sup>                                              | Covariate                       | Covariate Category      | Beta coefficient<br>(95% CI) <sup>^</sup> | P value |
|--------------------------------------------------------------------------------------------------------------------------|---------------------------------|-------------------------|-------------------------------------------|---------|
| Patient Female Sex                                                                                                       | None                            | None                    | -2.01 (-6.59 to 2.58)                     | 0.39    |
| Patient Age                                                                                                              | Patient Cancer                  |                         | -4.39 (-9.24 to 0.46)                     | 0.083   |
|                                                                                                                          | Patient History of Stroke       |                         | -1.11 (-8.73 to 6.52)                     | 0.77    |
|                                                                                                                          | Patient Chronic Liver Disease   |                         | 1.96 (-4.76 to 8.67)                      | 0.56    |
|                                                                                                                          | Patient End-Stage Renal Disease |                         | -9.01 (-21.23 to 3.21)                    | 0.15    |
|                                                                                                                          | Patient Baseline ADLs           |                         | 0.08 (-1.37 to 1.53)                      | 0.91    |
|                                                                                                                          | Patient Baseline iADLs          |                         | 0.22 (-0.15 to 0.59)                      | 0.25    |
|                                                                                                                          | Patient Advance Directive       |                         | -4.56 (-10.38 to 1.25)                    | 0.12    |
|                                                                                                                          | Surrogate HADS                  |                         | 0.96 (0.72 to 1.19)                       | <.0001  |
| Patient Insurance                                                                                                        | Patient Cancer                  |                         | -4.41 (-9.37 to 0.54)                     | 0.08    |
| Commercial<br>2.2 (-5.3 to 9.69)<br>Medicaid<br>1.81 (-7.73 to 11.35)<br>Medicare<br>0.22 (-7.07 to 7.51)<br>None<br>--- | Patient History of Stroke       |                         | -0.91 (-8.55 to 6.73)                     | 0.81    |
|                                                                                                                          | Patient Chronic Liver Disease   |                         | 2.79 (-3.79 to 9.38)                      | 0.40    |
|                                                                                                                          | Patient End-Stage Renal Disease |                         | -9.49 (-21.17 to 2.18)                    | 0.11    |
|                                                                                                                          | Patient Advance Directive       |                         | -3.44 (-9.21 to 2.33)                     | 0.24    |
|                                                                                                                          | Surrogate HADS                  |                         | 0.96 (0.73 to 1.19)                       | <.0001  |
| Patient Chronic Liver Disease<br>2.48 (-4.29 to 9.25)                                                                    | Patient RASS Score              | -5 to -4 (unresponsive) | 9.52 (3.45 to 15.59)                      | 0.004   |
|                                                                                                                          |                                 | -3 to -1 (arousable)    | 3.49 (-2.67 to 9.65)                      | 0.004   |
|                                                                                                                          |                                 | 0 or above (awake)      | ---                                       |         |
|                                                                                                                          | Patient Insurance               | Commercial              | -0.12 (-7.87 to 7.64)                     | 0.99    |
|                                                                                                                          |                                 | Medicaid                | -1.49 (-11.34 to 8.36)                    | 0.99    |
|                                                                                                                          |                                 | Medicare                | -0.26 (-8.42 to 7.9)                      | 0.99    |
|                                                                                                                          |                                 | None                    | ---                                       |         |
|                                                                                                                          | Patient Baseline ADLs           |                         | 0.21 (-1.29 to 1.71)                      | 0.78    |
|                                                                                                                          | Surrogate HADS                  |                         | 0.91 (0.67 to 1.14)                       | <.0001  |
|                                                                                                                          | Patient Baseline iADLs          |                         | 0.29 (-0.09 to 0.67)                      | 0.13    |
| Patient Age                                                                                                              |                                 | -0.11 (-0.26 to 0.04)   | 0.16                                      |         |
| Patient Cancer<br>4.45 (-9.53 to 0.62)                                                                                   | Patient Insurance               | Commercial              | 3.19 (-4.6 to 10.98)                      | 0.70    |
|                                                                                                                          |                                 | Medicaid                | 0.06 (-9.77 to 9.89)                      | 0.70    |
|                                                                                                                          |                                 | Medicare                | 0.74 (-7.38 to 8.86)                      | 0.70    |
|                                                                                                                          |                                 | None                    | ---                                       |         |
|                                                                                                                          | Patient Baseline ADLs           |                         | 0.14 (-1.33 to 1.61)                      | 0.85    |
|                                                                                                                          | Patient Advance Directive       |                         | -4.46 (-10.54 to 1.62)                    | 0.15    |
|                                                                                                                          | Surrogate HADS                  |                         | 0.95 (0.72 to 1.18)                       | <.0001  |
|                                                                                                                          | Patient Baseline iADLs          |                         | 0.25 (-0.12 to 0.62)                      | 0.19    |
|                                                                                                                          | Patient Age                     |                         | -0.04 (-0.19 to 0.11)                     | 0.58    |

|                                                           |                                 |                         |                         |        |
|-----------------------------------------------------------|---------------------------------|-------------------------|-------------------------|--------|
|                                                           | Patient Ethnicity               | Hispanic or Latino      | -1.6 (-9.7 to 6.5)      | 0.70   |
|                                                           | Patient Race                    | Black                   | 2.83 (-2.37 to 8.04)    | 0.47   |
|                                                           |                                 | Other                   | -1.22 (-8.9 to 6.46)    | 0.47   |
|                                                           |                                 | White                   | ---                     |        |
| Patient History of Stroke<br>-1.4 (-9.26 to 6.45)         | Patient Insurance               | Commercial              | 2.61 (-5.19 to 10.42)   | 0.83   |
|                                                           |                                 | Medicaid                | 0.05 (-9.84 to 9.94)    | 0.83   |
|                                                           |                                 | Medicare                | 0.83 (-7.33 to 8.99)    | 0.83   |
|                                                           |                                 | None                    | ---                     |        |
|                                                           | Patient Baseline ADLs           |                         | 0.22 (-1.25 to 1.69)    | 0.77   |
|                                                           | Patient Advance Directive       |                         | -3.81 (-9.9 to 2.28)    | 0.22   |
|                                                           | Surrogate HADS                  |                         | 0.96 (0.72 to 1.19)     | <.0001 |
|                                                           | Patient Baseline iADLs          |                         | 0.23 (-0.14 to 0.61)    | 0.22   |
|                                                           | Patient Age                     |                         | -0.04 (-0.2 to 0.11)    | 0.59   |
|                                                           | Patient Race                    | Black                   | 3.97 (-1.24 to 9.17)    | 0.27   |
| Other                                                     |                                 | -0.72 (-7.12 to 5.68)   | 0.27                    |        |
| White                                                     |                                 | ---                     |                         |        |
| Patient End-Stage Renal Disease<br>-8.58 (-20.94 to 3.79) | Patient RASS Score              | -5 to -4 (unresponsive) | 9.13 (3.02 to 15.24)    | 0.007  |
|                                                           |                                 | -3 to -1 (arousable)    | 9.13 (3.02 to 15.24)    | 0.007  |
|                                                           |                                 | 0 or above (awake)      | ---                     |        |
|                                                           | Patient Insurance               | Commercial              | 0.93 (-6.86 to 8.71)    | 0.98   |
|                                                           |                                 | Medicaid                | -0.7 (-10.52 to 9.12)   | 0.98   |
|                                                           |                                 | Medicare                | 0.67 (-7.52 to 8.86)    | 0.98   |
|                                                           |                                 | None                    | ---                     |        |
|                                                           | Patient Baseline ADLs           |                         | 0.28 (-1.23 to 1.78)    | 0.71   |
|                                                           | Patient Advance Directive       |                         | -3.04 (-9.33 to 3.25)   | 0.34   |
|                                                           | Surrogate HADS                  |                         | 0.96 (0.73 to 1.2)      | <.0001 |
|                                                           | Patient Baseline iADLs          |                         | 0.3 (-0.08 to 0.68)     | 0.12   |
|                                                           | Patient Age                     |                         | -0.1 (-0.25 to 0.06)    | 0.21   |
|                                                           | Patient Race                    | Black                   | 3.33 (-1.93 to 8.59)    | 0.28   |
| Other                                                     |                                 | -2.22 (-8.62 to 4.19)   | 0.28                    |        |
| White                                                     |                                 | ---                     |                         |        |
| Patient Advance Directive<br>-4.74 (-9.82 to 0.34)        | Patient Cancer                  |                         | -4.74 (-9.82 to 0.34)   | 0.07   |
|                                                           | Patient History of Stroke       |                         | -2.18 (-10.01 to 5.65)  | 0.58   |
|                                                           | Patient End-Stage Renal Disease |                         | -10.35 (-22.88 to 2.17) | 0.10   |
|                                                           | Patient Insurance               | Commercial              | 3.54 (-4.24 to 11.32)   | 0.74   |
|                                                           |                                 | Medicaid                | 0.86 (-9.02 to 10.73)   | 0.74   |
|                                                           |                                 | Medicare                | 1.49 (-6.65 to 9.64)    | 0.74   |
|                                                           |                                 | None                    | ---                     |        |
|                                                           | Patient Baseline ADLs           |                         | 0.11 (-1.36 to 1.58)    | 0.88   |
|                                                           | Surrogate HADS                  |                         | 0.97 (0.74 to 1.2)      | <.0001 |
| Patient Baseline iADLs                                    |                                 | 0.25 (-0.13 to 0.62)    | 0.19                    |        |
| Patient Age                                               |                                 | -0.04 (-0.19 to 0.11)   | 0.62                    |        |



|                                                                                                                                                     |                                 |                         |                         |                       |      |
|-----------------------------------------------------------------------------------------------------------------------------------------------------|---------------------------------|-------------------------|-------------------------|-----------------------|------|
|                                                                                                                                                     | Patient Ethnicity               | Hispanic or Latino      | -1.76 (-9.84 to 6.33)   | 0.67                  |      |
|                                                                                                                                                     | Patient Race                    | Black                   | 3.72 (-1.63 to 9.06)    | 0.33                  |      |
|                                                                                                                                                     |                                 | Other                   | -0.85 (-8.57 to 6.86)   | 0.33                  |      |
|                                                                                                                                                     |                                 | White                   | ---                     |                       |      |
| Patient Activities of Daily Living<br>0.14 (-1.32 to 1.6)                                                                                           | Patient Cancer                  |                         | -4.65 (-9.68 to 0.37)   | 0.08                  |      |
|                                                                                                                                                     | Patient History of Stroke       |                         | -1.29 (-9.09 to 6.5)    | 0.74                  |      |
|                                                                                                                                                     | Patient Chronic Liver Disease   |                         | 1.59 (-5.28 to 8.47)    | 0.65                  |      |
|                                                                                                                                                     | Patient End-Stage Renal Disease |                         | -7.95 (-20.38 to 4.49)  | 0.21                  |      |
|                                                                                                                                                     | Patient Insurance               | Commercial              |                         | 2.34 (-5.49 to 10.16) | 0.84 |
|                                                                                                                                                     |                                 | Medicaid                |                         | 0.07 (-9.89 to 10.04) | 0.84 |
|                                                                                                                                                     |                                 | Medicare                |                         | 0.3 (-7.87 to 8.47)   | 0.84 |
|                                                                                                                                                     |                                 | None                    |                         | ---                   |      |
|                                                                                                                                                     | Surrogate HADS                  |                         | 0.93 (0.7 to 1.17)      | <.0001                |      |
| Patient Baseline iADLs                                                                                                                              |                                 | 0.24 (-0.14 to 0.61)    | 0.22                    |                       |      |
| Patient Age                                                                                                                                         |                                 | -0.06 (-0.21 to 0.09)   | 0.44                    |                       |      |
| Pre-ICU Hospital Length of Stay<br>0.01 (-0.22 to 0.25)                                                                                             | Patient Chronic Liver Disease   |                         | 3.39 (-3.07 to 9.85)    | 0.301                 |      |
|                                                                                                                                                     | Surrogate HADS                  |                         | 0.94 (0.71 to 1.17)     | <.0001                |      |
|                                                                                                                                                     | Patient Age                     |                         | -0.05 (-0.18 to 0.08)   | 0.43                  |      |
| ProVent14 Score<br>-0.04 (-0.15 to 0.08)                                                                                                            | Patient RASS Score              | -5 to -4 (unresponsive) | 9.62 (1.92 to 17.32)    | 0.02                  |      |
|                                                                                                                                                     |                                 | -3 to -1 (arousable)    | 3.75 (-4.02 to 11.52)   | 0.02                  |      |
|                                                                                                                                                     |                                 | 0 or above (awake)      | ---                     |                       |      |
|                                                                                                                                                     | Patient Baseline ADLs           |                         | -0.92 (-2.19 to 0.35)   | 0.15                  |      |
|                                                                                                                                                     | Surrogate HADS                  |                         | 1.01 (0.76 to 1.26)     | <.0001                |      |
|                                                                                                                                                     | Pre-ICU Hospital LOS            |                         | 0.15 (-0.13 to 0.43)    | 0.30                  |      |
| Patient RASS Score<br>-5 to -4 (unresponsive)<br>8.39 (0.83 to 15.95)<br>-3 to -1 (arousable)<br>2.48 (-5.18 to 10.15)<br>0 or above (awake)<br>--- | Patient Chronic Liver Disease   |                         | 3.65 (-3.66 to 10.96)   | 0.32                  |      |
|                                                                                                                                                     | Patient End-Stage Renal Disease |                         | -4.45 (-19.24 to 10.33) | 0.55                  |      |
|                                                                                                                                                     | Surrogate HADS                  |                         | 0.97 (0.71 to 1.22)     | <.0001                |      |
|                                                                                                                                                     | ProVent14 Score                 |                         | -0.02 (-0.14 to 0.09)   | 0.71                  |      |

For continuous variables, the coefficient represents mean change in IES-R score per one unit increase. For categorical variables, the coefficient represents mean difference in IES-R score as compared to the reference group.

€ All models were adjusted for multiple respondents

--- Indicates reference group
